# Supplementary material for: A carbon–silica–zirconia ceramic membrane with CO2 flow-switching behaviour promising versatile high-temperature H2/CO2 separation
Source: Royal Society of Chemistry journal article supplement (doi:10.1039/d0ta07065c), 2020-01-01
Supplement: d0ta07065c1.pdf [file d0ta07065c1.pdf]

## Electronic Supplementary Information

### A Carbon-Silica-Zirconia Ceramic Membrane with CO<sub>2</sub> Flow-Switching Behavior Promising Versatile High-Temperature H<sub>2</sub>/CO<sub>2</sub> Separation

Sulaiman Oladipo Lawal, Liang Yu, Hiroki Nagasawa, Toshinori Tsuru, and Masakoto Kanezashi\*

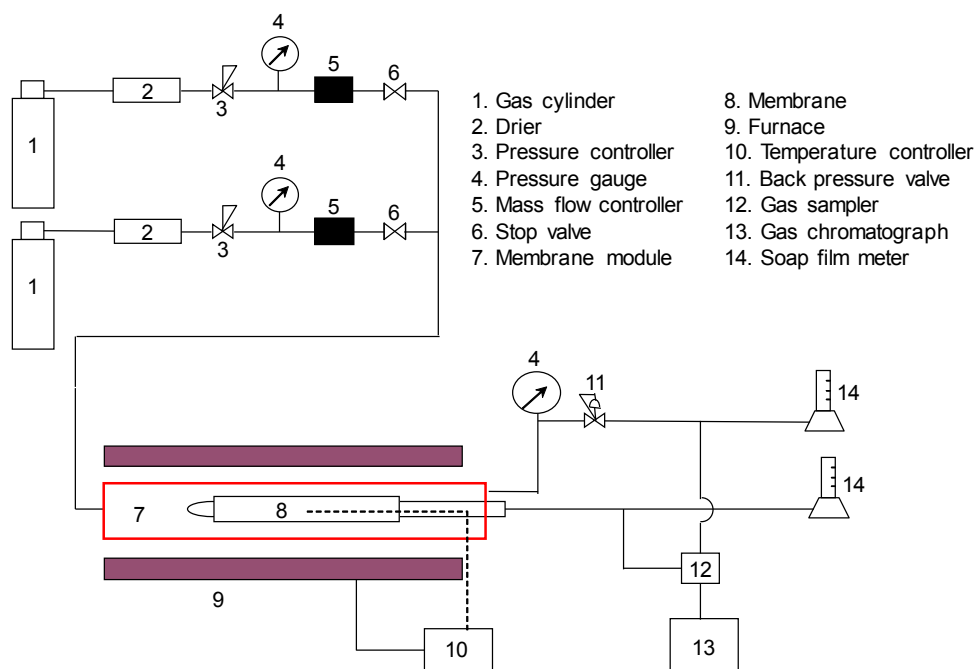

Fig. S1. Schematic flow diagram of the gas permeation testing setup (Test pressures:  $P_u = 200\text{--}500$  kPa,  $P_d = 100$  kPa)

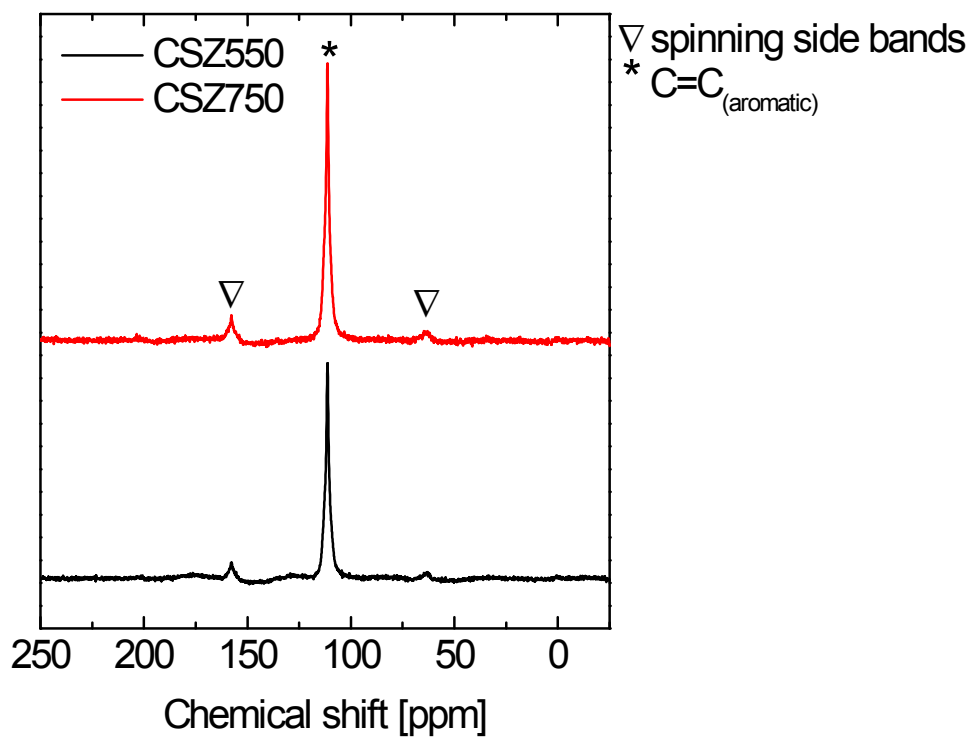

Figure S2. DD-MAS-<sup>13</sup>C-NMR spectra of C-SiO<sub>2</sub>-ZrO<sub>2</sub> prepared at 550 and 750 °C under N<sub>2</sub>

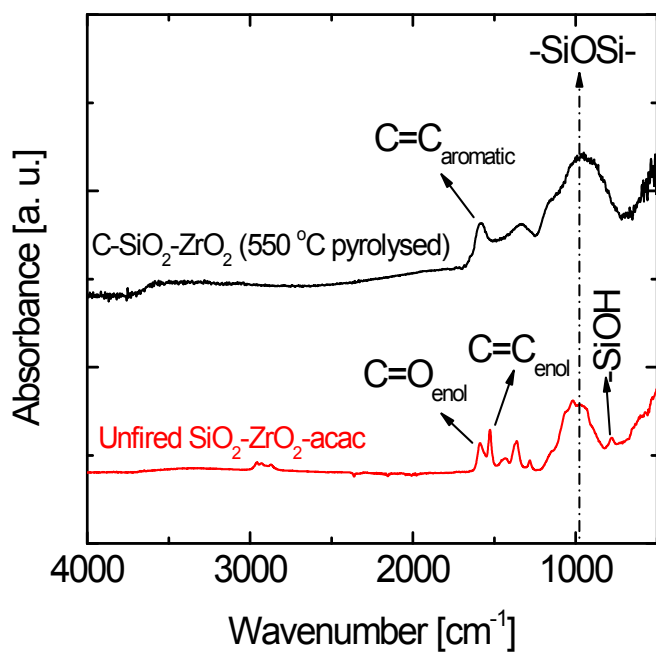

Figure S3. FT-IR spectra of SiO<sub>2</sub>-ZrO<sub>2</sub>-acac powder before and after pyrolysis at 550 °C under N<sub>2</sub>

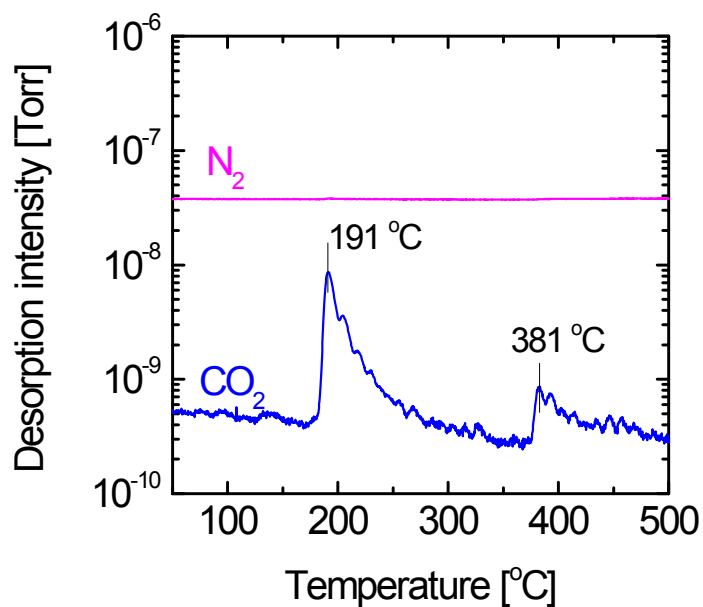

Figure S4.  $\text{N}_2/\text{CO}_2$  mixture temperature programmed desorption in C- $\text{SiO}_2$ - $\text{ZrO}_2$  powder prepared at  $550^{\circ}\text{C}$  under  $\text{N}_2$

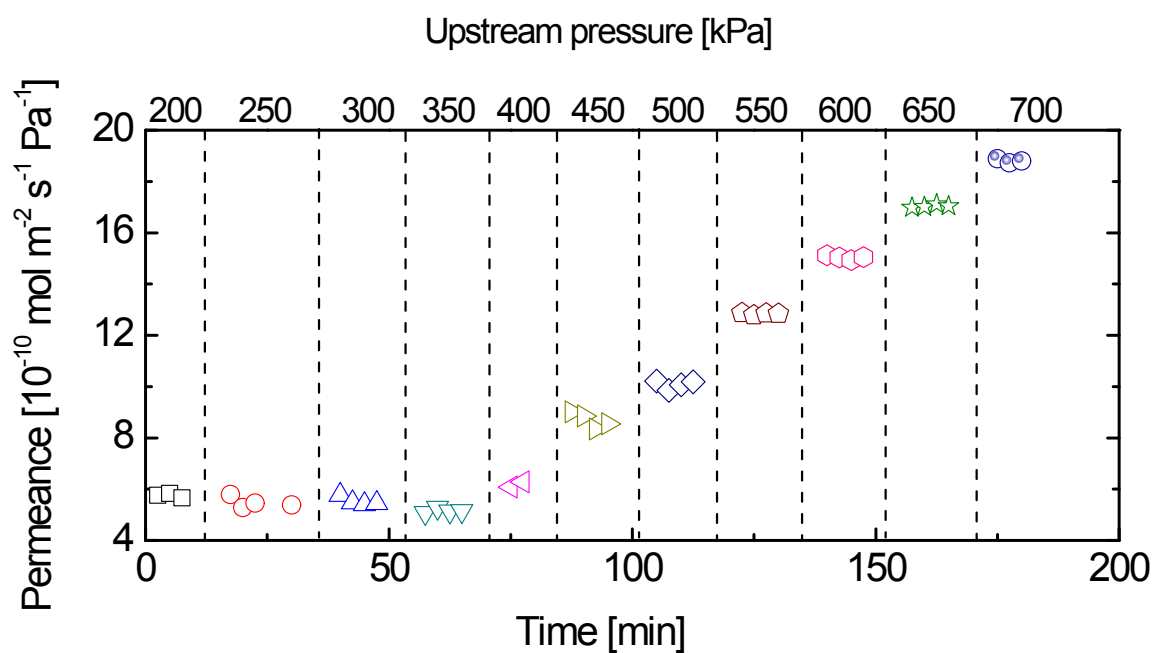

Figure S5. Detailed time course of single  $\text{CO}_2$  permeance at pressures ranging from 200 to 700 kPa

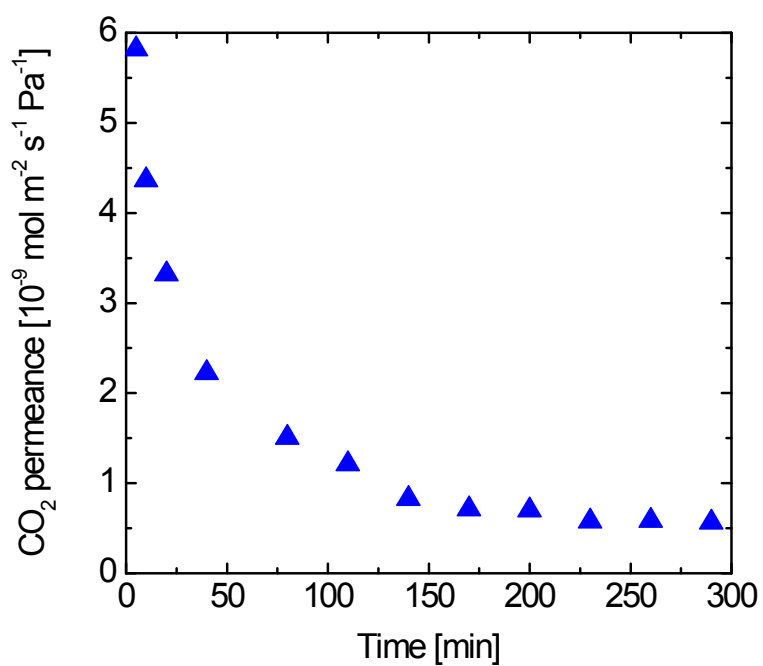

Figure S6. Initial transient CO<sub>2</sub> permeance at 200 kPa and 300 °C before steady state

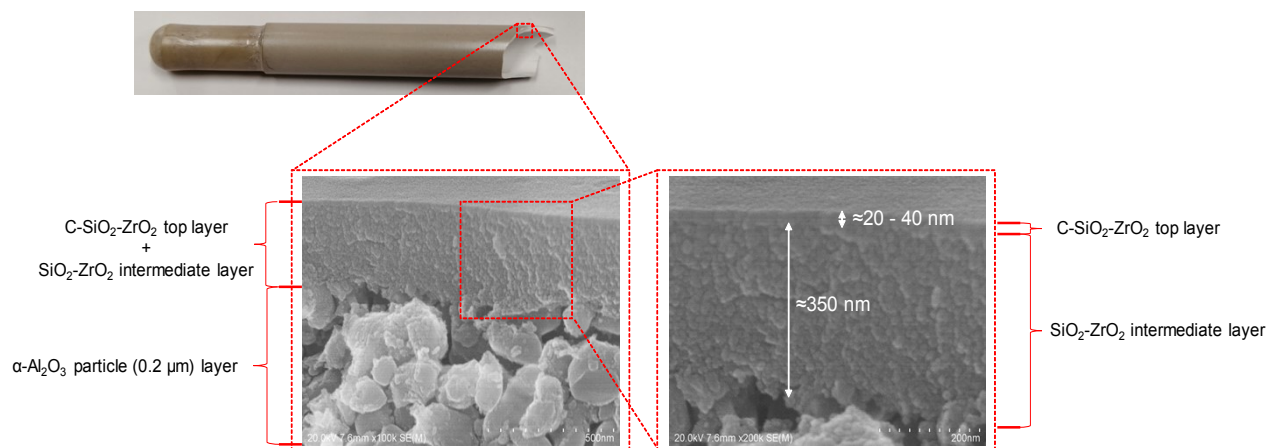

Fig. S7 FE-SEM images of the cross-section profile of a C-SiO<sub>2</sub>-ZrO<sub>2</sub> membrane.

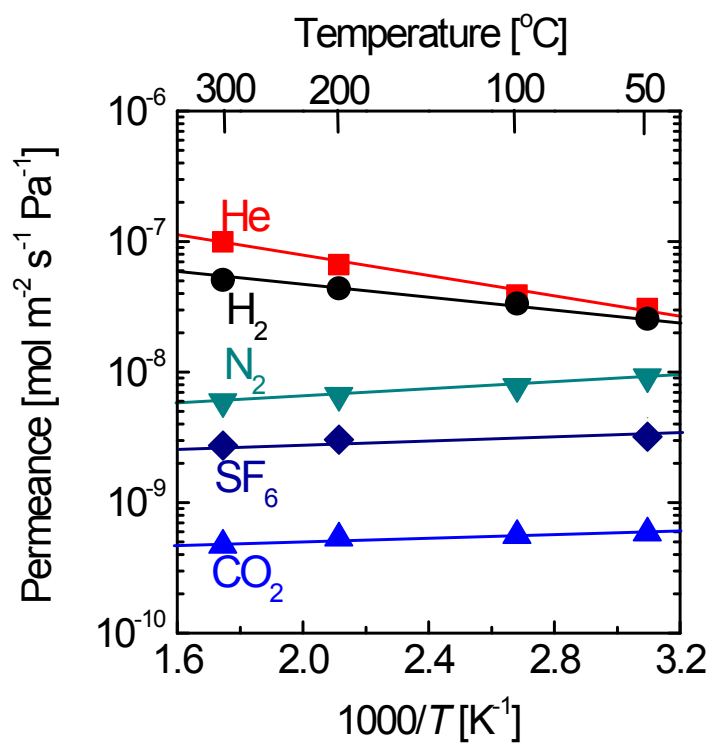

Figure S8. Temperature dependence of single-gas permeance and permeance ratios at temperatures ranging from 50 to 300 °C for a C-SiO<sub>2</sub>-ZrO<sub>2</sub> membrane prepared at 550 °C

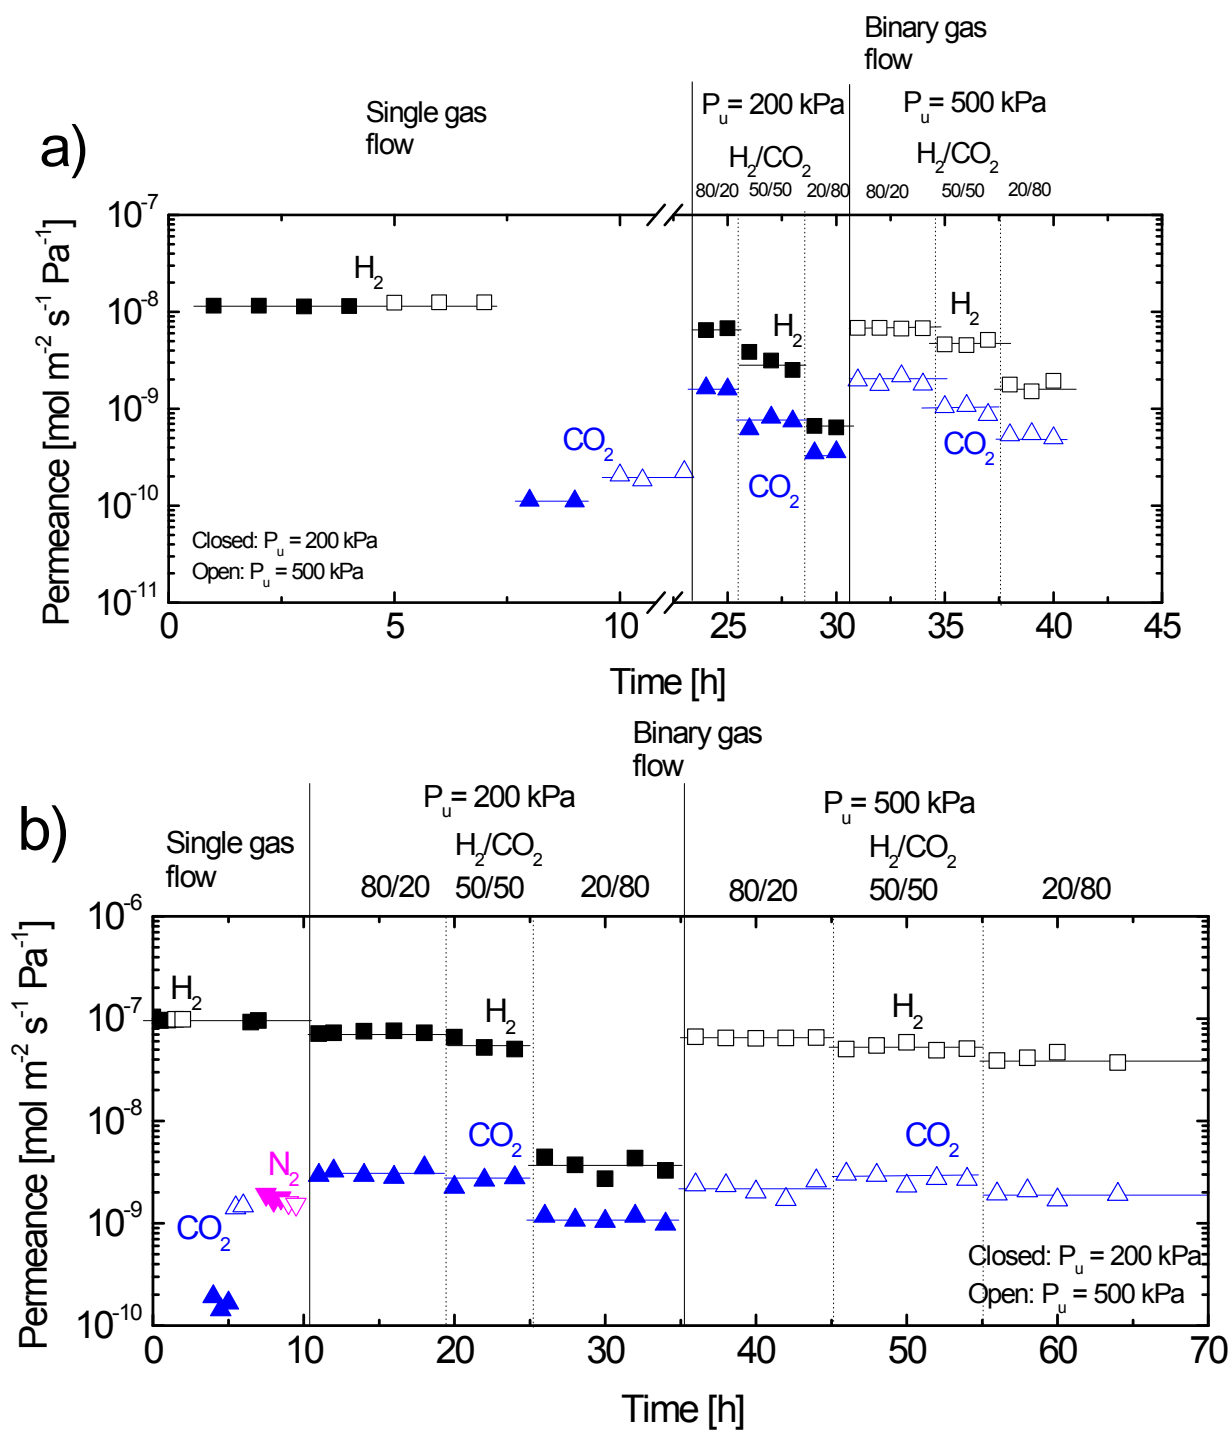

Figure S9. Detailed time courses for the permeance of single-gas and a binary-gas mixture at 50 (a) and 300 °C (b)

As presented by Kamaruddin and Koros [1], the mass flux of a species, A, that is the result of the bulk motion of a mixture of gases, A and B, can be written as follows:

$$n_A^{bulk} = (n_A + n_B)\omega_A \quad (S1)$$

Where  $n_A$ ,  $n_B$  and  $\omega_A$  are the total mass flux of components A and B and the concentration of component A, respectively. Equation S1 for the mass flux of CO<sub>2</sub> caused by the bulk motion of a mixture of CO<sub>2</sub> and H<sub>2</sub> could be written as follows:

$$n_{CO_2}^{bulk} = (n_{H_2} + n_{CO_2})\omega_{CO_2} \quad (S2)$$

The fraction of the bulk-flow contribution that a component makes to the total mass flux in a gaseous mixture is defined as the ratio of the bulk mass flux of the component to the total mass flux. For the CO<sub>2</sub> component in a H<sub>2</sub>/CO<sub>2</sub> mixture, equation S3 gives the fraction of the H<sub>2</sub>-CO<sub>2</sub> bulk flux contributed by the CO<sub>2</sub> flow [1].

$$\prod_{CO_2}^{bulk} = \frac{n_{CO_2}^{bulk}}{n_{CO_2}} = \frac{(n_{H_2} + n_{CO_2})\omega_{CO_2}}{n_{CO_2}} = (1 + r)\omega_{CO_2}^{avg} \quad (S3)$$

Where  $\prod^{bulk}$  is the fraction of the bulk flux contribution,  $r$  is the permeance ratio of H<sub>2</sub> to CO<sub>2</sub> and  $\omega^{avg}$  is the average CO<sub>2</sub> concentration across the membrane thickness. Applying the log mean difference of CO<sub>2</sub> concentration across the membrane thickness, equation S3 becomes

$$\prod_{CO_2}^{bulk} = (1 + r) \frac{(\omega_{CO_2}^f - \omega_{CO_2}^r)}{\ln \left( \frac{\omega_{CO_2}^f - \omega_{CO_2}^p}{\omega_{CO_2}^r - \omega_{CO_2}^p} \right)} \quad (S4)$$

For a single CO<sub>2</sub> flow, while adopting a single H<sub>2</sub> flow as the frame of reference with a linear CO<sub>2</sub> concentration gradient, equation S3 can be written as follows:

$$\prod_{CO_2}^{bulk} = \left(1 + \frac{1}{r}\right) \left( \frac{\omega_{CO_2}^f + \omega_{CO_2}^p}{2} \right) \quad (S5)$$

Where  $\omega^f$ ,  $\omega^r$  and  $\omega^p$  are the concentrations of CO<sub>2</sub> in the feed, retentate and permeate, respectively, and  $r$  becomes the ideal selectivity of H<sub>2</sub> over CO<sub>2</sub>. Equations S4 and S5 can thus be plotted against the CO<sub>2</sub> feed-side pressure, as shown in Figure S8. Clearly, the bulk phase flow contribution of CO<sub>2</sub> is much higher in the binary mixture than in pure CO<sub>2</sub> flow and increases as the CO<sub>2</sub> feed pressure increases.

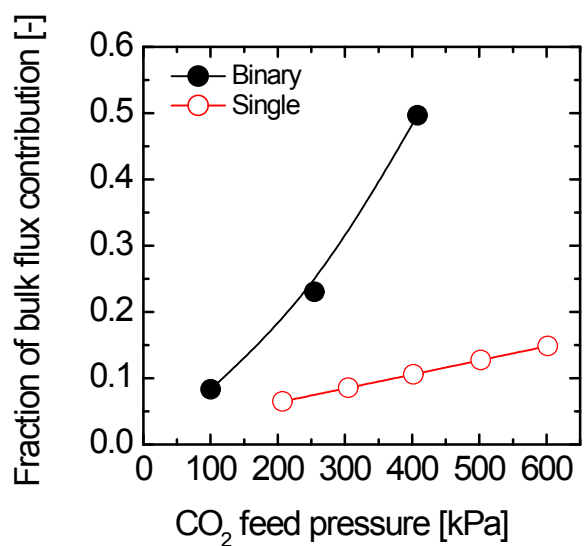

Figure S10. Calculated fraction of the CO<sub>2</sub> bulk flux contribution at 300 °C as a function of the CO<sub>2</sub> feed pressure in single and binary systems (at total  $P_u = 500$  kPa)



Table S1. Comparison of H<sub>2</sub> permeance-H<sub>2</sub>/CO<sub>2</sub> mixture selectivity trade-off of high-temperature H<sub>2</sub>/CO<sub>2</sub> separation membranes

| No.             | Membrane type                        | Separation mechanism                          | H <sub>2</sub> permeance x 10 <sup>-8</sup><br>[mol m <sup>-2</sup> s <sup>-1</sup> Pa <sup>-1</sup> ] | H <sub>2</sub> /CO <sub>2</sub> selectivity<br>[-] | Reference |
|-----------------|--------------------------------------|-----------------------------------------------|--------------------------------------------------------------------------------------------------------|----------------------------------------------------|-----------|
| 200-300 °C      |                                      |                                               |                                                                                                        |                                                    |           |
| 1               | Zeolite (SAPO-34)                    | Size exclusion                                | 7                                                                                                      | 23                                                 | [2]       |
| 2               | ZIF-7                                | Size exclusion                                | 4.5                                                                                                    | 13.6                                               | [3]       |
| 3               | Zeolite (B-ZSM-5)                    | Size exclusion                                | 0.6                                                                                                    | 33                                                 | [4]       |
| 4               | SiC                                  | Size exclusion                                | 0.89                                                                                                   | 49                                                 | [5]       |
| 5               | Si                                   | Size exclusion                                | 50                                                                                                     | 6.8                                                | [6]       |
| 6               | Pd-organosilica                      | H <sub>2</sub> flow enhancement               | 5.8                                                                                                    | 33.5                                               | [7]       |
| >300 °C         |                                      |                                               |                                                                                                        |                                                    |           |
| 7               | SiO <sub>2</sub> -TiO <sub>2</sub>   | Size exclusion                                | 24.2                                                                                                   | 13.6                                               | [8]       |
| 8               | MFI-type Zeolite                     | Size exclusion                                | 39.6                                                                                                   | 141                                                | [9]       |
| 9               | Zeolite (B-ZSM-5)                    | Size exclusion                                | 10                                                                                                     | 47                                                 | [4]       |
| 300 °C, 500 kPa |                                      |                                               |                                                                                                        |                                                    |           |
|                 | C-SiO <sub>2</sub> -ZrO <sub>2</sub> | Flow transition H <sub>2</sub><br>enhancement | 7                                                                                                      | 20-30                                              | This work |

#### Supplementary references

- [1] H. D. Kamaruddin, and W. J. Koros, *J. Membr. Sci.*, **1997**, 135, 147
- [2] M. Yu, H. Funke, R. D. Noble and J. L. Falconer, *J. Am. Chem. Soc.*, **2011**, 133, 1748
- [3] A. Huang, Y. Chen, Q. Liu, N. Wang, J. Jiang and J. Caro, *J. Membr. Sci.*, **2014**, 454, 126
- [4] M. Hong, J. L. Falconer and R. D. Noble, *Ind. Eng. Chem. Res.*, **2005**, 44, 4035
- [5] B. Elyassi, M. Sahimi and T. T. Tsotsis, *J. Membr. Sci.*, **2007**, 288, 290
- [6] R. M. de Vos and H. Verweij, *Science*, **1998**, 279, 1710
- [7] J. Lei, H. Song, Y. Wei, S. Zhao and H. Qi, *Micr. Meso. Mater.*, **2017**, 253, 55
- [8] Y. Gu and S. T. Oyama, *J. Membr. Sci.*, **2009**, 345, 267
- [9] Z. Tang, J. Dong and T. M. Nenoff, *Langmuir*, **2009**, 25 (9), 4848
